# Supplementary material for: Design and Testing of Mobile Laboratory for Mitigation of Gaseous Emissions from Livestock Agriculture with Photocatalysis
Source: Preprints.org preprint supplement (doi:10.20944/preprints202012.0608.v1), 2020-12-24
Supplement: Supplementary file 1 [file supplementary]

Archive with 1 entries (1 files):
- Supplementary Materials.pdf
